# Supplementary material for: Ultralow thermal conductivity of Tl4Ag18Te11
Source: Royal Society of Chemistry journal article supplement (doi:10.1039/c9tc02029b), 2019-01-01
Supplement: c9tc02029b1.pdf [file c9tc02029b1.pdf]

Supplementary Information

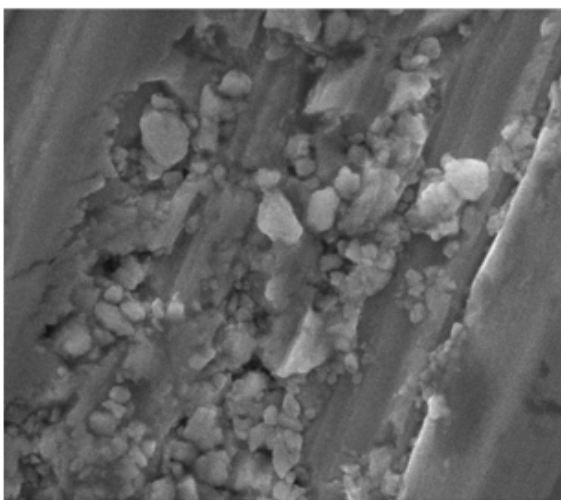

Electron Image 1

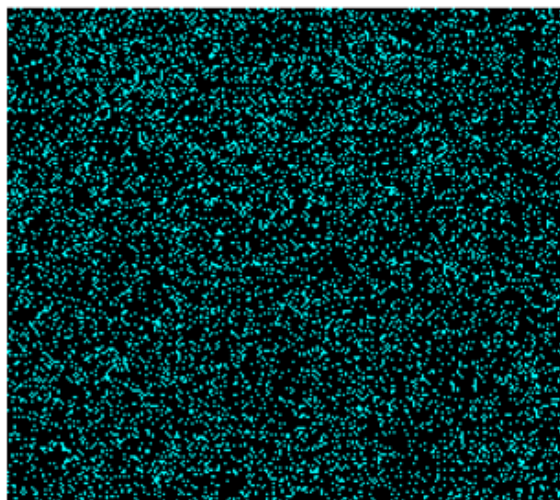

Ag La1

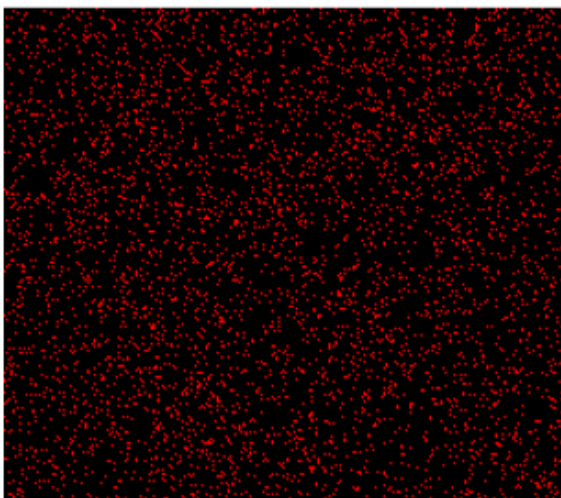

Te La1

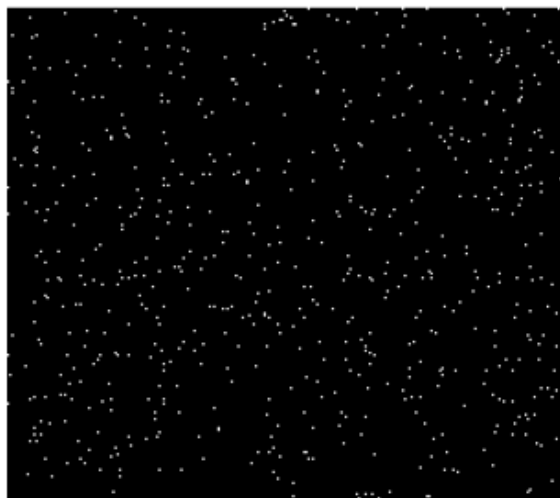

Tl La1

Figure S1. SEM images of " $\text{Tl}_{4.05}\text{Ag}_{18}\text{Te}_{11}$ ". Each image corresponds to a width of 13  $\mu\text{m}$ .

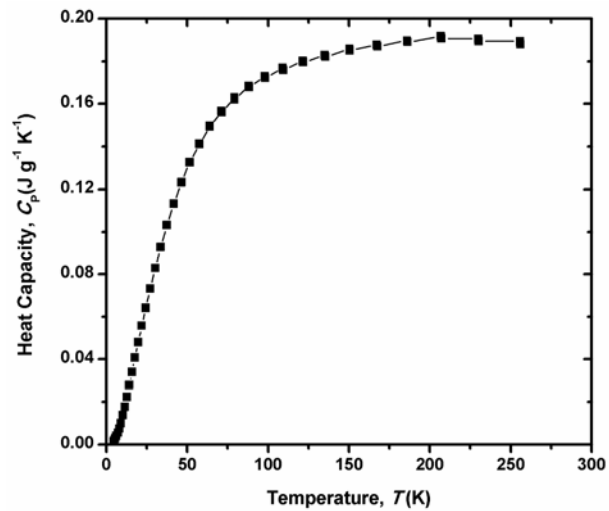

Figure S2. Specific heat of “ $Tl_{4.05}Ag_{18}Te_{11}$ ”.

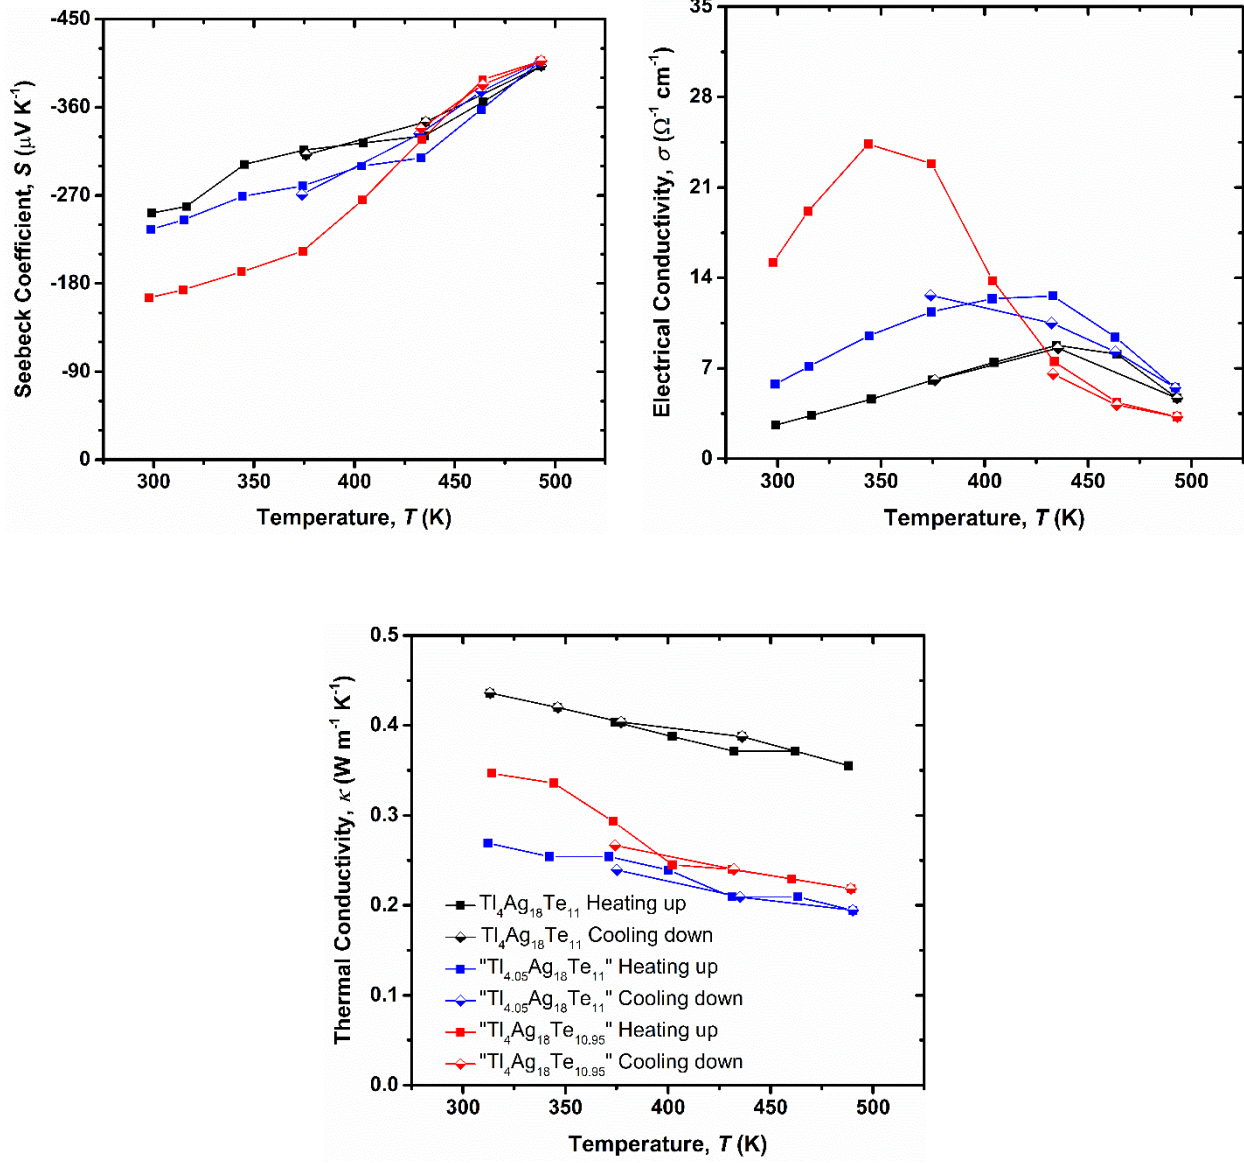

Figure S3. Comparison of the heating and the cooling data. During cooldown, a few data points were measured to verify the stability of the materials under the measurement conditions. These are presented in the figures below via half-open symbols.
